# Supplementary material
Source: PubMed Central journal article supplement (PMC2909136)
Supplement: NIHMS218474-supplement-Supp_Info.pdf [file NIHMS218474-supplement-Supp_Info.pdf]

## Salicylaldimine Ruthenium Alkylidene Complexes: Metathesis Catalysts Tuned for Protic Solvents

Joseph B. Binder, Ilia A. Guzei, and Ronald T. Raines\*

| <b>Page</b> | <b>Contents</b>                                                      |
|-------------|----------------------------------------------------------------------|
| S1          | Table of Contents                                                    |
| S2          | Figure S1: Solid-state molecular structure of complex <b>7a</b>      |
| S3          | Figure S2: Solid-state molecular structure of complex <b>7a</b>      |
| S4          | Table S1: Crystal data and structure refinement of complex <b>7a</b> |
| S5          | Table S2: Atomic coordinates of complex <b>7a</b>                    |
| S6          | Table S3: Bond lengths and angles of complex <b>7a</b>               |
| S9          | Table S4: Anisotropic displacement parameters of complex <b>7a</b>   |
| S10         | Table S5: Hydrogen coordinates of complex <b>7a</b>                  |
| S11         | Table S6: Torsion angles of complex <b>7a</b>                        |

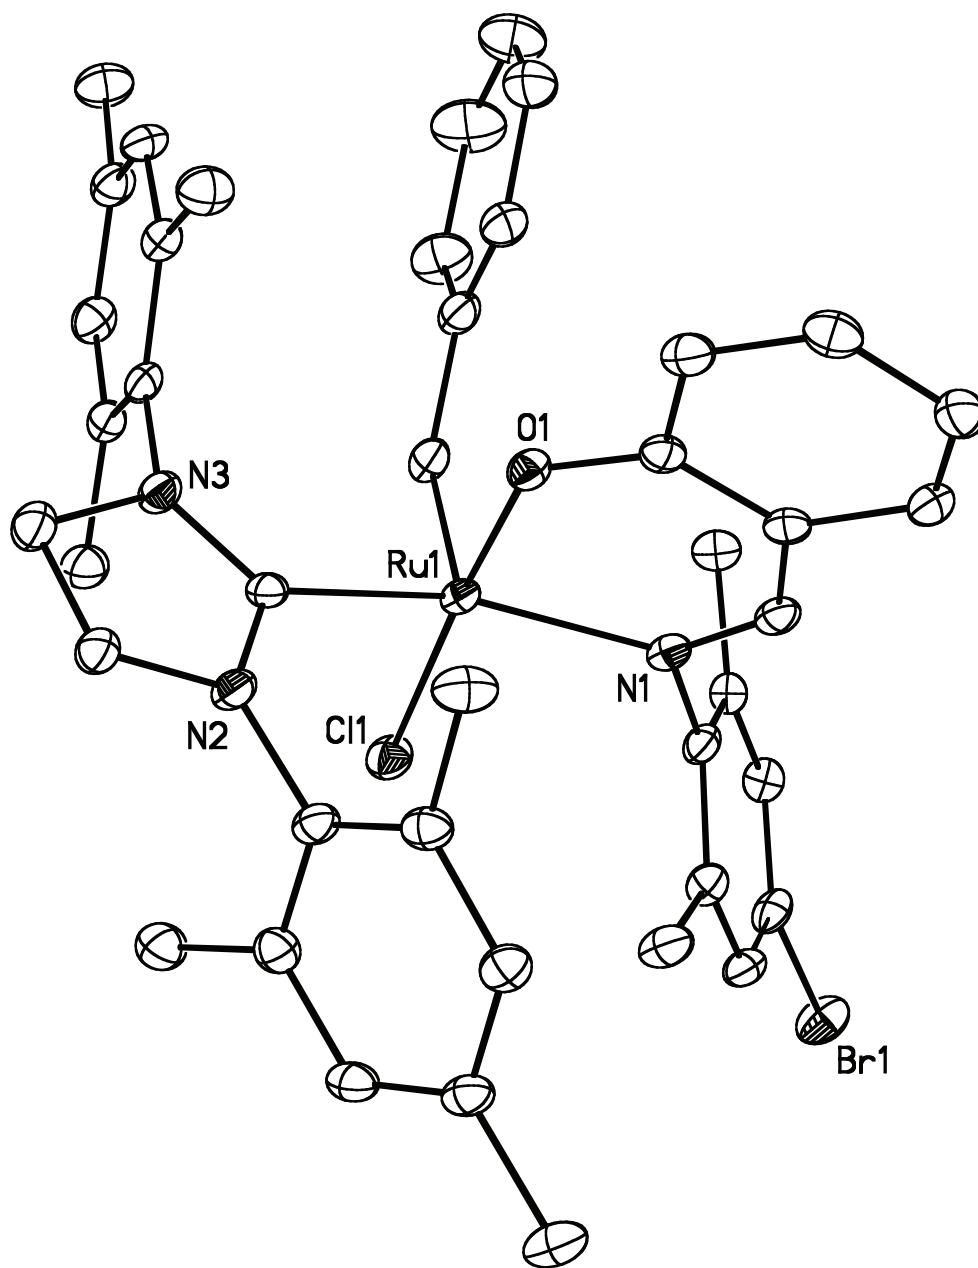

**Figure 1S.** Solid-state molecular structure of complex **7a**. Hydrogen atoms are omitted for clarity. Thermal ellipsoids are shown at 50% probability.

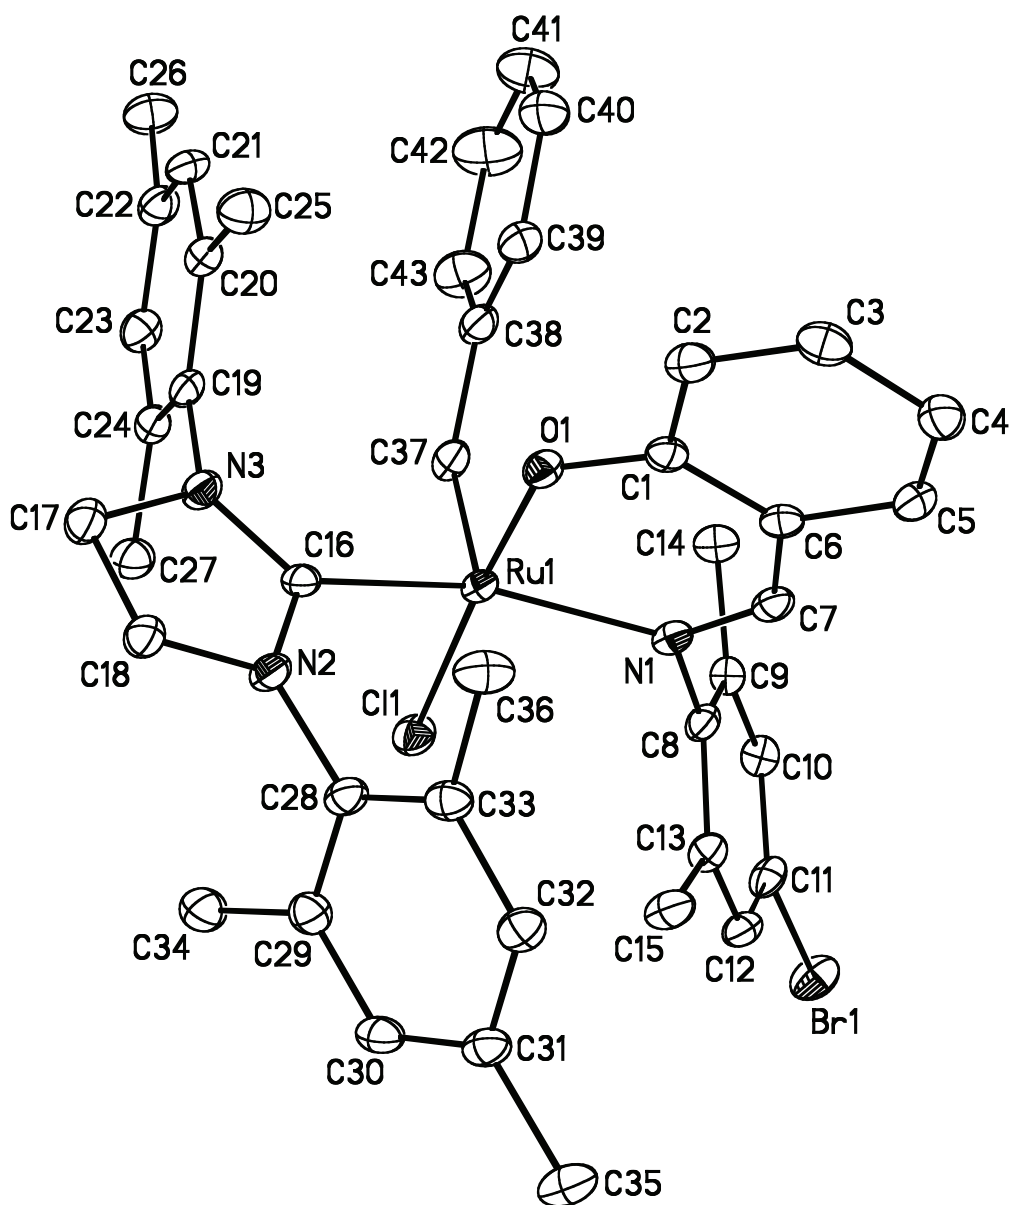

**Figure 2S.** Solid-state molecular structure of complex **7a**. Hydrogen atoms are omitted for clarity. Thermal ellipsoids are shown at 50% probability.

**Table S1.** Crystal data and structure refinement of complex **7a**.

|                                        |                                                        |                               |
|----------------------------------------|--------------------------------------------------------|-------------------------------|
| Identification code                    | raines05                                               |                               |
| Empirical formula                      | C <sub>43</sub> H <sub>45</sub> BrClN <sub>3</sub> ORu |                               |
| Formula weight                         | 836.25                                                 |                               |
| Temperature                            | 100(2) K                                               |                               |
| Wavelength                             | 0.71073 Å                                              |                               |
| Crystal system                         | Triclinic                                              |                               |
| Space group                            | $P\bar{1}$                                             |                               |
| Unit cell dimensions                   | $a = 11.2903(8)$ Å                                     | $\alpha = 107.0270(10)^\circ$ |
|                                        | $b = 11.3962(8)$ Å                                     | $\beta = 90.5140(10)^\circ$   |
|                                        | $c = 16.3627(12)$ Å                                    | $\gamma = 110.8190(10)^\circ$ |
| Volume                                 | 1866.5(2) Å <sup>3</sup>                               |                               |
| Z                                      | 2                                                      |                               |
| Density (calculated)                   | 1.488 Mg/m <sup>3</sup>                                |                               |
| Absorption coefficient                 | 1.600 mm <sup>-1</sup>                                 |                               |
| $F(000)$                               | 856                                                    |                               |
| Crystal size                           | 0.36 × 0.31 × 0.30 mm <sup>3</sup>                     |                               |
| Theta range for data collection        | 1.31 to 26.39°                                         |                               |
| Index ranges                           | -14 ≤ $h$ ≤ 14, -14 ≤ $k$ ≤ 14, -20 ≤ $l$ ≤ 20         |                               |
| Reflections collected                  | 27052                                                  |                               |
| Independent reflections                | 7597 [ $R(\text{int}) = 0.0252$ ]                      |                               |
| Completeness to theta = 26.39°         | 99.4%                                                  |                               |
| Absorption correction                  | Multi-scan with SADABS                                 |                               |
| Max. and min. transmission             | 0.6454 and 0.5966                                      |                               |
| Refinement method                      | Full-matrix least-squares on $F^2$                     |                               |
| Data / restraints / parameters         | 7597 / 0 / 459                                         |                               |
| Goodness-of-fit on $F^2$               | 1.079                                                  |                               |
| Final $R$ indices [ $I > 2\sigma(I)$ ] | $R1 = 0.0262$ , $wR2 = 0.0662$                         |                               |
| $R$ indices (all data)                 | $R1 = 0.0335$ , $wR2 = 0.0739$                         |                               |
| Largest diff. peak and hole            | 0.925 and -0.396 e.Å <sup>-3</sup>                     |                               |

**Table S2.** Atomic coordinates ( $\times 10^4$ ) and equivalent isotropic displacement parameters ( $\text{\AA}^2 \times 10^3$ ) of complex **7a**.  $U(\text{eq})$  is defined as one third of the trace of the orthogonalized  $U^{ij}$  tensor.

|       | <i>x</i> | <i>y</i> | <i>z</i> | <i>U</i> (eq) |
|-------|----------|----------|----------|---------------|
| Ru(1) | 6706(1)  | 9153(1)  | 2513(1)  | 14(1)         |
| Br(1) | 1145(1)  | 2716(1)  | 1665(1)  | 26(1)         |
| Cl(1) | 6017(1)  | 7643(1)  | 3327(1)  | 22(1)         |
| O(1)  | 7410(1)  | 10286(1) | 1727(1)  | 16(1)         |
| N(1)  | 5202(2)  | 7849(2)  | 1528(1)  | 16(1)         |
| N(2)  | 9405(2)  | 9574(2)  | 2856(1)  | 17(1)         |
| N(3)  | 9121(2)  | 11259(2) | 3741(1)  | 17(1)         |
| C(1)  | 7012(2)  | 10059(2) | 926(1)   | 16(1)         |
| C(2)  | 7702(2)  | 10975(2) | 510(2)   | 19(1)         |
| C(3)  | 7386(2)  | 10780(2) | -341(2)  | 21(1)         |
| C(4)  | 6342(2)  | 9662(2)  | -841(2)  | 21(1)         |
| C(5)  | 5635(2)  | 8787(2)  | -449(1)  | 19(1)         |
| C(6)  | 5933(2)  | 8943(2)  | 429(1)   | 16(1)         |
| C(7)  | 5125(2)  | 7959(2)  | 762(1)   | 17(1)         |
| C(8)  | 4242(2)  | 6665(2)  | 1611(1)  | 16(1)         |
| C(9)  | 3092(2)  | 6684(2)  | 1912(1)  | 17(1)         |
| C(10) | 2169(2)  | 5496(2)  | 1936(1)  | 18(1)         |
| C(11) | 2417(2)  | 4348(2)  | 1668(1)  | 19(1)         |
| C(12) | 3561(2)  | 4331(2)  | 1391(1)  | 19(1)         |
| C(13) | 4499(2)  | 5503(2)  | 1362(1)  | 17(1)         |
| C(14) | 2844(2)  | 7948(2)  | 2219(2)  | 21(1)         |
| C(15) | 5779(2)  | 5526(2)  | 1100(2)  | 22(1)         |
| C(16) | 8514(2)  | 10075(2) | 3139(1)  | 15(1)         |
| C(17) | 10498(2) | 11565(2) | 3937(2)  | 22(1)         |
| C(18) | 10723(2) | 10503(2) | 3207(2)  | 19(1)         |
| C(19) | 8542(2)  | 12092(2) | 4284(1)  | 16(1)         |
| C(20) | 8664(2)  | 13280(2) | 4147(1)  | 18(1)         |
| C(21) | 8110(2)  | 14077(2) | 4685(2)  | 20(1)         |
| C(22) | 7442(2)  | 13715(2) | 5338(2)  | 20(1)         |
| C(23) | 7365(2)  | 12542(2) | 5468(1)  | 21(1)         |
| C(24) | 7919(2)  | 11715(2) | 4954(1)  | 19(1)         |
| C(25) | 9340(2)  | 13679(2) | 3426(2)  | 24(1)         |
| C(26) | 6792(2)  | 14561(2) | 5878(2)  | 27(1)         |
| C(27) | 7821(2)  | 10450(2) | 5115(2)  | 24(1)         |
| C(28) | 9173(2)  | 8281(2)  | 2255(1)  | 17(1)         |
| C(29) | 8989(2)  | 7224(2)  | 2578(2)  | 19(1)         |
| C(30) | 8820(2)  | 5994(2)  | 1994(2)  | 19(1)         |
| C(31) | 8828(2)  | 5790(2)  | 1115(2)  | 19(1)         |
| C(32) | 9046(2)  | 6860(2)  | 819(2)   | 19(1)         |
| C(33) | 9246(2)  | 8127(2)  | 1378(2)  | 18(1)         |
| C(34) | 8979(2)  | 7388(2)  | 3527(2)  | 25(1)         |
| C(35) | 8582(2)  | 4424(2)  | 504(2)   | 26(1)         |
| C(36) | 9574(2)  | 9273(2)  | 1029(2)  | 23(1)         |
| C(37) | 5970(2)  | 10202(2) | 3222(1)  | 19(1)         |
| C(38) | 5700(2)  | 11372(2) | 3206(2)  | 20(1)         |
| C(39) | 6186(2)  | 12132(2) | 2666(2)  | 23(1)         |
| C(40) | 5873(3)  | 13216(3) | 2700(2)  | 29(1)         |
| C(41) | 5058(3)  | 13554(3) | 3269(2)  | 38(1)         |
| C(42) | 4575(3)  | 12827(3) | 3814(2)  | 40(1)         |
| C(43) | 4898(2)  | 11745(3) | 3790(2)  | 30(1)         |

**Table S3.** Bond lengths [Å] and angles [°] of complex **7a**.

|              |            |              |          |
|--------------|------------|--------------|----------|
| Ru(1)-C(37)  | 1.838(2)   | C(20)-C(25)  | 1.505(3) |
| Ru(1)-C(16)  | 2.032(2)   | C(21)-C(22)  | 1.389(3) |
| Ru(1)-O(1)   | 2.0530(15) | C(21)-H(21)  | 0.9500   |
| Ru(1)-N(1)   | 2.1080(18) | C(22)-C(23)  | 1.388(3) |
| Ru(1)-Cl(1)  | 2.3976(6)  | C(22)-C(26)  | 1.506(3) |
| Br(1)-C(11)  | 1.902(2)   | C(23)-C(24)  | 1.397(3) |
| O(1)-C(1)    | 1.301(3)   | C(23)-H(23)  | 0.9500   |
| N(1)-C(7)    | 1.301(3)   | C(24)-C(27)  | 1.506(3) |
| N(1)-C(8)    | 1.444(3)   | C(25)-H(25A) | 0.9800   |
| N(2)-C(16)   | 1.347(3)   | C(25)-H(25B) | 0.9800   |
| N(2)-C(28)   | 1.442(3)   | C(25)-H(25C) | 0.9800   |
| N(2)-C(18)   | 1.475(3)   | C(26)-H(26A) | 0.9800   |
| N(3)-C(16)   | 1.346(3)   | C(26)-H(26B) | 0.9800   |
| N(3)-C(19)   | 1.441(3)   | C(26)-H(26C) | 0.9800   |
| N(3)-C(17)   | 1.477(3)   | C(27)-H(27A) | 0.9800   |
| C(1)-C(2)    | 1.417(3)   | C(27)-H(27B) | 0.9800   |
| C(1)-C(6)    | 1.428(3)   | C(27)-H(27C) | 0.9800   |
| C(2)-C(3)    | 1.367(3)   | C(28)-C(33)  | 1.400(3) |
| C(2)-H(2)    | 0.9500     | C(28)-C(29)  | 1.404(3) |
| C(3)-C(4)    | 1.410(3)   | C(29)-C(30)  | 1.392(3) |
| C(3)-H(3)    | 0.9500     | C(29)-C(34)  | 1.510(3) |
| C(4)-C(5)    | 1.364(3)   | C(30)-C(31)  | 1.388(3) |
| C(4)-H(4)    | 0.9500     | C(30)-H(30)  | 0.9500   |
| C(5)-C(6)    | 1.417(3)   | C(31)-C(32)  | 1.384(3) |
| C(5)-H(5)    | 0.9500     | C(31)-C(35)  | 1.509(3) |
| C(6)-C(7)    | 1.423(3)   | C(32)-C(33)  | 1.402(3) |
| C(7)-H(7)    | 0.9500     | C(32)-H(32)  | 0.9500   |
| C(8)-C(9)    | 1.398(3)   | C(33)-C(36)  | 1.505(3) |
| C(8)-C(13)   | 1.401(3)   | C(34)-H(34A) | 0.9800   |
| C(9)-C(10)   | 1.396(3)   | C(34)-H(34B) | 0.9800   |
| C(9)-C(14)   | 1.507(3)   | C(34)-H(34C) | 0.9800   |
| C(10)-C(11)  | 1.381(3)   | C(35)-H(35A) | 0.9800   |
| C(10)-H(10)  | 0.9500     | C(35)-H(35B) | 0.9800   |
| C(11)-C(12)  | 1.377(3)   | C(35)-H(35C) | 0.9800   |
| C(12)-C(13)  | 1.393(3)   | C(36)-H(36A) | 0.9800   |
| C(12)-H(12)  | 0.9500     | C(36)-H(36B) | 0.9800   |
| C(13)-C(15)  | 1.505(3)   | C(36)-H(36C) | 0.9800   |
| C(14)-H(14A) | 0.9800     | C(37)-C(38)  | 1.476(3) |
| C(14)-H(14B) | 0.9800     | C(37)-H(37)  | 0.9500   |
| C(14)-H(14C) | 0.9800     | C(38)-C(39)  | 1.398(4) |
| C(15)-H(15A) | 0.9800     | C(38)-C(43)  | 1.402(3) |
| C(15)-H(15B) | 0.9800     | C(39)-C(40)  | 1.387(3) |
| C(15)-H(15C) | 0.9800     | C(39)-H(39)  | 0.9500   |
| C(17)-C(18)  | 1.528(3)   | C(40)-C(41)  | 1.385(4) |
| C(17)-H(17A) | 0.9900     | C(40)-H(40)  | 0.9500   |
| C(17)-H(17B) | 0.9900     | C(41)-C(42)  | 1.379(4) |
| C(18)-H(18A) | 0.9900     | C(41)-H(41)  | 0.9500   |
| C(18)-H(18B) | 0.9900     | C(42)-C(43)  | 1.395(4) |
| C(19)-C(20)  | 1.396(3)   | C(42)-H(42)  | 0.9500   |
| C(19)-C(24)  | 1.399(3)   | C(43)-H(43)  | 0.9500   |
| C(20)-C(21)  | 1.391(3)   |              |          |

|                   |            |                     |            |
|-------------------|------------|---------------------|------------|
| C(37)-Ru(1)-C(16) | 98.28(9)   | C(8)-C(13)-C(15)    | 120.8(2)   |
| C(37)-Ru(1)-O(1)  | 98.70(9)   | C(9)-C(14)-H(14A)   | 109.5      |
| C(16)-Ru(1)-O(1)  | 83.79(7)   | C(9)-C(14)-H(14B)   | 109.5      |
| C(37)-Ru(1)-N(1)  | 103.07(8)  | H(14A)-C(14)-H(14B) | 109.5      |
| C(16)-Ru(1)-N(1)  | 158.34(8)  | C(9)-C(14)-H(14C)   | 109.5      |
| O(1)-Ru(1)-N(1)   | 89.40(6)   | H(14A)-C(14)-H(14C) | 109.5      |
| C(37)-Ru(1)-Cl(1) | 88.79(8)   | H(14B)-C(14)-H(14C) | 109.5      |
| C(16)-Ru(1)-Cl(1) | 94.73(6)   | C(13)-C(15)-H(15A)  | 109.5      |
| O(1)-Ru(1)-Cl(1)  | 172.50(4)  | C(13)-C(15)-H(15B)  | 109.5      |
| N(1)-Ru(1)-Cl(1)  | 89.35(5)   | H(15A)-C(15)-H(15B) | 109.5      |
| C(1)-O(1)-Ru(1)   | 128.81(14) | C(13)-C(15)-H(15C)  | 109.5      |
| C(7)-N(1)-C(8)    | 113.62(18) | H(15A)-C(15)-H(15C) | 109.5      |
| C(7)-N(1)-Ru(1)   | 123.27(15) | H(15B)-C(15)-H(15C) | 109.5      |
| C(8)-N(1)-Ru(1)   | 122.74(14) | N(3)-C(16)-N(2)     | 107.30(18) |
| C(16)-N(2)-C(28)  | 126.34(18) | N(3)-C(16)-Ru(1)    | 132.79(16) |
| C(16)-N(2)-C(18)  | 113.45(18) | N(2)-C(16)-Ru(1)    | 119.09(15) |
| C(28)-N(2)-C(18)  | 120.19(17) | N(3)-C(17)-C(18)    | 102.23(17) |
| C(16)-N(3)-C(19)  | 126.97(18) | N(3)-C(17)-H(17A)   | 111.3      |
| C(16)-N(3)-C(17)  | 113.04(18) | C(18)-C(17)-H(17A)  | 111.3      |
| C(19)-N(3)-C(17)  | 119.04(17) | N(3)-C(17)-H(17B)   | 111.3      |
| O(1)-C(1)-C(2)    | 117.95(19) | C(18)-C(17)-H(17B)  | 111.3      |
| O(1)-C(1)-C(6)    | 124.8(2)   | H(17A)-C(17)-H(17B) | 109.2      |
| C(2)-C(1)-C(6)    | 117.2(2)   | N(2)-C(18)-C(17)    | 101.67(17) |
| C(3)-C(2)-C(1)    | 121.8(2)   | N(2)-C(18)-H(18A)   | 111.4      |
| C(3)-C(2)-H(2)    | 119.1      | C(17)-C(18)-H(18A)  | 111.4      |
| C(1)-C(2)-H(2)    | 119.1      | N(2)-C(18)-H(18B)   | 111.4      |
| C(2)-C(3)-C(4)    | 121.2(2)   | C(17)-C(18)-H(18B)  | 111.4      |
| C(2)-C(3)-H(3)    | 119.4      | H(18A)-C(18)-H(18B) | 109.3      |
| C(4)-C(3)-H(3)    | 119.4      | C(20)-C(19)-C(24)   | 121.9(2)   |
| C(5)-C(4)-C(3)    | 118.2(2)   | C(20)-C(19)-N(3)    | 118.9(2)   |
| C(5)-C(4)-H(4)    | 120.9      | C(24)-C(19)-N(3)    | 119.2(2)   |
| C(3)-C(4)-H(4)    | 120.9      | C(21)-C(20)-C(19)   | 118.0(2)   |
| C(4)-C(5)-C(6)    | 122.6(2)   | C(21)-C(20)-C(25)   | 120.5(2)   |
| C(4)-C(5)-H(5)    | 118.7      | C(19)-C(20)-C(25)   | 121.5(2)   |
| C(6)-C(5)-H(5)    | 118.7      | C(22)-C(21)-C(20)   | 121.9(2)   |
| C(5)-C(6)-C(7)    | 117.2(2)   | C(22)-C(21)-H(21)   | 119.0      |
| C(5)-C(6)-C(1)    | 119.0(2)   | C(20)-C(21)-H(21)   | 119.0      |
| C(7)-C(6)-C(1)    | 123.8(2)   | C(23)-C(22)-C(21)   | 118.6(2)   |
| N(1)-C(7)-C(6)    | 129.6(2)   | C(23)-C(22)-C(26)   | 120.7(2)   |
| N(1)-C(7)-H(7)    | 115.2      | C(21)-C(22)-C(26)   | 120.8(2)   |
| C(6)-C(7)-H(7)    | 115.2      | C(22)-C(23)-C(24)   | 121.8(2)   |
| C(9)-C(8)-C(13)   | 121.8(2)   | C(22)-C(23)-H(23)   | 119.1      |
| C(9)-C(8)-N(1)    | 120.70(19) | C(24)-C(23)-H(23)   | 119.1      |
| C(13)-C(8)-N(1)   | 117.49(19) | C(23)-C(24)-C(19)   | 117.8(2)   |
| C(10)-C(9)-C(8)   | 118.3(2)   | C(23)-C(24)-C(27)   | 120.5(2)   |
| C(10)-C(9)-C(14)  | 120.1(2)   | C(19)-C(24)-C(27)   | 121.7(2)   |
| C(8)-C(9)-C(14)   | 121.6(2)   | C(20)-C(25)-H(25A)  | 109.5      |
| C(11)-C(10)-C(9)  | 119.6(2)   | C(20)-C(25)-H(25B)  | 109.5      |
| C(11)-C(10)-H(10) | 120.2      | H(25A)-C(25)-H(25B) | 109.5      |
| C(9)-C(10)-H(10)  | 120.2      | C(20)-C(25)-H(25C)  | 109.5      |
| C(12)-C(11)-C(10) | 122.3(2)   | H(25A)-C(25)-H(25C) | 109.5      |
| C(12)-C(11)-Br(1) | 117.85(17) | H(25B)-C(25)-H(25C) | 109.5      |
| C(10)-C(11)-Br(1) | 119.80(17) | C(22)-C(26)-H(26A)  | 109.5      |
| C(11)-C(12)-C(13) | 119.3(2)   | C(22)-C(26)-H(26B)  | 109.5      |
| C(11)-C(12)-H(12) | 120.4      | H(26A)-C(26)-H(26B) | 109.5      |
| C(13)-C(12)-H(12) | 120.4      | C(22)-C(26)-H(26C)  | 109.5      |
| C(12)-C(13)-C(8)  | 118.7(2)   | H(26A)-C(26)-H(26C) | 109.5      |
| C(12)-C(13)-C(15) | 120.5(2)   | H(26B)-C(26)-H(26C) | 109.5      |

|                     |          |                     |            |
|---------------------|----------|---------------------|------------|
| C(24)-C(27)-H(27A)  | 109.5    | H(35A)-C(35)-H(35B) | 109.5      |
| C(24)-C(27)-H(27B)  | 109.5    | C(31)-C(35)-H(35C)  | 109.5      |
| H(27A)-C(27)-H(27B) | 109.5    | H(35A)-C(35)-H(35C) | 109.5      |
| C(24)-C(27)-H(27C)  | 109.5    | H(35B)-C(35)-H(35C) | 109.5      |
| H(27A)-C(27)-H(27C) | 109.5    | C(33)-C(36)-H(36A)  | 109.5      |
| H(27B)-C(27)-H(27C) | 109.5    | C(33)-C(36)-H(36B)  | 109.5      |
| C(33)-C(28)-C(29)   | 121.4(2) | H(36A)-C(36)-H(36B) | 109.5      |
| C(33)-C(28)-N(2)    | 119.8(2) | C(33)-C(36)-H(36C)  | 109.5      |
| C(29)-C(28)-N(2)    | 118.6(2) | H(36A)-C(36)-H(36C) | 109.5      |
| C(30)-C(29)-C(28)   | 118.0(2) | H(36B)-C(36)-H(36C) | 109.5      |
| C(30)-C(29)-C(34)   | 119.8(2) | C(38)-C(37)-Ru(1)   | 134.46(18) |
| C(28)-C(29)-C(34)   | 122.2(2) | C(38)-C(37)-H(37)   | 112.8      |
| C(31)-C(30)-C(29)   | 122.2(2) | Ru(1)-C(37)-H(37)   | 112.8      |
| C(31)-C(30)-H(30)   | 118.9    | C(39)-C(38)-C(43)   | 118.1(2)   |
| C(29)-C(30)-H(30)   | 118.9    | C(39)-C(38)-C(37)   | 125.3(2)   |
| C(32)-C(31)-C(30)   | 118.5(2) | C(43)-C(38)-C(37)   | 116.6(2)   |
| C(32)-C(31)-C(35)   | 121.4(2) | C(40)-C(39)-C(38)   | 120.9(2)   |
| C(30)-C(31)-C(35)   | 120.1(2) | C(40)-C(39)-H(39)   | 119.5      |
| C(31)-C(32)-C(33)   | 121.9(2) | C(38)-C(39)-H(39)   | 119.5      |
| C(31)-C(32)-H(32)   | 119.0    | C(41)-C(40)-C(39)   | 120.2(3)   |
| C(33)-C(32)-H(32)   | 119.0    | C(41)-C(40)-H(40)   | 119.9      |
| C(28)-C(33)-C(32)   | 117.9(2) | C(39)-C(40)-H(40)   | 119.9      |
| C(28)-C(33)-C(36)   | 122.4(2) | C(42)-C(41)-C(40)   | 119.9(3)   |
| C(32)-C(33)-C(36)   | 119.6(2) | C(42)-C(41)-H(41)   | 120.0      |
| C(29)-C(34)-H(34A)  | 109.5    | C(40)-C(41)-H(41)   | 120.0      |
| C(29)-C(34)-H(34B)  | 109.5    | C(41)-C(42)-C(43)   | 120.1(3)   |
| H(34A)-C(34)-H(34B) | 109.5    | C(41)-C(42)-H(42)   | 119.9      |
| C(29)-C(34)-H(34C)  | 109.5    | C(43)-C(42)-H(42)   | 119.9      |
| H(34A)-C(34)-H(34C) | 109.5    | C(42)-C(43)-C(38)   | 120.7(3)   |
| H(34B)-C(34)-H(34C) | 109.5    | C(42)-C(43)-H(43)   | 119.7      |
| C(31)-C(35)-H(35A)  | 109.5    | C(38)-C(43)-H(43)   | 119.7      |
| C(31)-C(35)-H(35B)  | 109.5    |                     |            |

---

Symmetry transformations were used to generate equivalent atoms.



**Table S4.** Anisotropic displacement parameters ( $\text{\AA}^2 \times 10^3$ ) of complex **7a**. The anisotropic displacement factor exponent takes the form:  $-2\pi^2[h^2 a^{*2}U^{11} + \dots + 2 h k a^* b^* U^{12}]$ .

|       | $U^{11}$ | $U^{22}$ | $U^{33}$ | $U^{23}$ | $U^{13}$ | $U^{12}$ |
|-------|----------|----------|----------|----------|----------|----------|
| Ru(1) | 14(1)    | 10(1)    | 15(1)    | 2(1)     | 2(1)     | 4(1)     |
| Br(1) | 26(1)    | 17(1)    | 29(1)    | 7(1)     | 8(1)     | -1(1)    |
| Cl(1) | 25(1)    | 16(1)    | 21(1)    | 7(1)     | 2(1)     | 3(1)     |
| O(1)  | 16(1)    | 13(1)    | 17(1)    | 4(1)     | 2(1)     | 3(1)     |
| N(1)  | 15(1)    | 12(1)    | 18(1)    | 3(1)     | 3(1)     | 5(1)     |
| N(2)  | 15(1)    | 12(1)    | 20(1)    | 1(1)     | 1(1)     | 4(1)     |
| N(3)  | 16(1)    | 14(1)    | 18(1)    | 1(1)     | 1(1)     | 6(1)     |
| C(1)  | 17(1)    | 15(1)    | 18(1)    | 3(1)     | 3(1)     | 10(1)    |
| C(2)  | 19(1)    | 14(1)    | 25(1)    | 6(1)     | 3(1)     | 6(1)     |
| C(3)  | 21(1)    | 20(1)    | 26(1)    | 13(1)    | 8(1)     | 8(1)     |
| C(4)  | 25(1)    | 21(1)    | 18(1)    | 6(1)     | 3(1)     | 11(1)    |
| C(5)  | 22(1)    | 14(1)    | 18(1)    | 1(1)     | 1(1)     | 7(1)     |
| C(6)  | 17(1)    | 14(1)    | 19(1)    | 4(1)     | 4(1)     | 9(1)     |
| C(7)  | 16(1)    | 13(1)    | 20(1)    | 1(1)     | 2(1)     | 7(1)     |
| C(8)  | 17(1)    | 12(1)    | 15(1)    | 2(1)     | -1(1)    | 2(1)     |
| C(9)  | 17(1)    | 18(1)    | 15(1)    | 5(1)     | 1(1)     | 6(1)     |
| C(10) | 16(1)    | 21(1)    | 17(1)    | 6(1)     | 5(1)     | 6(1)     |
| C(11) | 20(1)    | 13(1)    | 17(1)    | 4(1)     | 1(1)     | -2(1)    |
| C(12) | 21(1)    | 12(1)    | 19(1)    | 2(1)     | 2(1)     | 5(1)     |
| C(13) | 16(1)    | 16(1)    | 18(1)    | 3(1)     | 2(1)     | 5(1)     |
| C(14) | 22(1)    | 18(1)    | 25(1)    | 8(1)     | 6(1)     | 8(1)     |
| C(15) | 19(1)    | 16(1)    | 29(1)    | 2(1)     | 4(1)     | 7(1)     |
| C(16) | 20(1)    | 11(1)    | 15(1)    | 5(1)     | 1(1)     | 6(1)     |
| C(17) | 18(1)    | 19(1)    | 25(1)    | 1(1)     | -3(1)    | 7(1)     |
| C(18) | 16(1)    | 16(1)    | 22(1)    | 2(1)     | -1(1)    | 5(1)     |
| C(19) | 18(1)    | 13(1)    | 14(1)    | -1(1)    | -1(1)    | 5(1)     |
| C(20) | 19(1)    | 14(1)    | 17(1)    | 3(1)     | -1(1)    | 4(1)     |
| C(21) | 23(1)    | 12(1)    | 22(1)    | 2(1)     | 1(1)     | 7(1)     |
| C(22) | 22(1)    | 18(1)    | 19(1)    | 2(1)     | 2(1)     | 8(1)     |
| C(23) | 24(1)    | 21(1)    | 16(1)    | 5(1)     | 4(1)     | 6(1)     |
| C(24) | 20(1)    | 15(1)    | 17(1)    | 4(1)     | -2(1)    | 4(1)     |
| C(25) | 29(1)    | 22(1)    | 22(1)    | 8(1)     | 7(1)     | 11(1)    |
| C(26) | 33(1)    | 22(1)    | 29(1)    | 6(1)     | 10(1)    | 14(1)    |
| C(27) | 30(1)    | 19(1)    | 21(1)    | 7(1)     | 1(1)     | 8(1)     |
| C(28) | 15(1)    | 14(1)    | 21(1)    | 2(1)     | 2(1)     | 6(1)     |
| C(29) | 17(1)    | 19(1)    | 22(1)    | 6(1)     | 2(1)     | 8(1)     |
| C(30) | 20(1)    | 14(1)    | 26(1)    | 8(1)     | 4(1)     | 7(1)     |
| C(31) | 16(1)    | 15(1)    | 25(1)    | 3(1)     | 4(1)     | 7(1)     |
| C(32) | 19(1)    | 19(1)    | 19(1)    | 4(1)     | 5(1)     | 9(1)     |
| C(33) | 15(1)    | 16(1)    | 23(1)    | 6(1)     | 5(1)     | 7(1)     |
| C(34) | 33(1)    | 23(1)    | 21(1)    | 7(1)     | 2(1)     | 13(1)    |
| C(35) | 29(1)    | 15(1)    | 31(1)    | 3(1)     | 6(1)     | 8(1)     |
| C(36) | 29(1)    | 20(1)    | 26(1)    | 9(1)     | 11(1)    | 12(1)    |
| C(37) | 17(1)    | 16(1)    | 18(1)    | 1(1)     | 0(1)     | 4(1)     |
| C(38) | 18(1)    | 17(1)    | 22(1)    | -1(1)    | -1(1)    | 7(1)     |
| C(39) | 26(1)    | 19(1)    | 21(1)    | 1(1)     | 0(1)     | 11(1)    |
| C(40) | 37(1)    | 24(1)    | 28(1)    | 6(1)     | 1(1)     | 16(1)    |
| C(41) | 43(2)    | 33(2)    | 47(2)    | 9(1)     | 7(1)     | 29(1)    |
| C(42) | 42(2)    | 38(2)    | 52(2)    | 11(1)    | 20(1)    | 30(1)    |
| C(43) | 27(1)    | 28(1)    | 37(2)    | 8(1)     | 11(1)    | 14(1)    |

**Table S5.** Hydrogen coordinates ( $\times 10^4$ ) and isotropic displacement parameters ( $\text{\AA}^2 \times 10^3$ ) of complex **7a**.

|        | <i>x</i> | <i>y</i> | <i>z</i> | <i>U</i> (eq) |
|--------|----------|----------|----------|---------------|
| H(2)   | 8404     | 11745    | 831      | 23            |
| H(3)   | 7878     | 11410    | -600     | 25            |
| H(4)   | 6137     | 9521     | -1435    | 25            |
| H(5)   | 4916     | 8044     | -777     | 23            |
| H(7)   | 4426     | 7283     | 366      | 20            |
| H(10)  | 1377     | 5477     | 2134     | 22            |
| H(12)  | 3709     | 3528     | 1223     | 22            |
| H(14A) | 3345     | 8493     | 2783     | 32            |
| H(14B) | 1933     | 7738     | 2271     | 32            |
| H(14C) | 3094     | 8435     | 1805     | 32            |
| H(15A) | 5797     | 4637     | 970      | 33            |
| H(15B) | 6451     | 6144     | 1573     | 33            |
| H(15C) | 5922     | 5813     | 588      | 33            |
| H(17A) | 10693    | 11489    | 4507     | 27            |
| H(17B) | 11020    | 12464    | 3927     | 27            |
| H(18A) | 11171    | 10875    | 2769     | 23            |
| H(18B) | 11220    | 10073    | 3427     | 23            |
| H(21)  | 8191     | 14893    | 4604     | 23            |
| H(23)  | 6924     | 12295    | 5920     | 25            |
| H(25A) | 9099     | 14369    | 3314     | 35            |
| H(25B) | 9095     | 12908    | 2905     | 35            |
| H(25C) | 10265    | 14021    | 3590     | 35            |
| H(26A) | 6128     | 14027    | 6146     | 41            |
| H(26B) | 6403     | 14906    | 5513     | 41            |
| H(26C) | 7422     | 15301    | 6329     | 41            |
| H(27A) | 7523     | 10452    | 5676     | 35            |
| H(27B) | 8663     | 10383    | 5113     | 35            |
| H(27C) | 7215     | 9693     | 4661     | 35            |
| H(30)  | 8694     | 5269     | 2203     | 23            |
| H(32)  | 9060     | 6731     | 219      | 22            |
| H(34A) | 8254     | 6660     | 3609     | 37            |
| H(34B) | 8901     | 8233     | 3829     | 37            |
| H(34C) | 9777     | 7379     | 3761     | 37            |
| H(35A) | 8468     | 4423     | -91      | 39            |
| H(35B) | 7807     | 3788     | 621      | 39            |
| H(35C) | 9310     | 4175     | 585      | 39            |
| H(36A) | 9307     | 9957     | 1400     | 35            |
| H(36B) | 9132     | 8967     | 444      | 35            |
| H(36C) | 10499    | 9642     | 1017     | 35            |
| H(37)  | 5703     | 9930     | 3708     | 22            |
| H(39)  | 6739     | 11903    | 2269     | 27            |
| H(40)  | 6218     | 13727    | 2332     | 35            |
| H(41)  | 4833     | 14287    | 3283     | 46            |
| H(42)  | 4020     | 13063    | 4206     | 48            |
| H(43)  | 4571     | 11256    | 4173     | 36            |

**Table S6.** Torsion angles [°] of complex **7a**.

|                         |             |                         |             |
|-------------------------|-------------|-------------------------|-------------|
| C(37)-Ru(1)-O(1)-C(1)   | -108.13(18) | C(18)-N(2)-C(16)-Ru(1)  | 164.69(15)  |
| C(16)-Ru(1)-O(1)-C(1)   | 154.40(18)  | C(37)-Ru(1)-C(16)-N(3)  | -15.3(2)    |
| N(1)-Ru(1)-O(1)-C(1)    | -5.00(17)   | O(1)-Ru(1)-C(16)-N(3)   | 82.6(2)     |
| Cl(1)-Ru(1)-O(1)-C(1)   | 75.4(4)     | N(1)-Ru(1)-C(16)-N(3)   | 154.99(19)  |
| C(37)-Ru(1)-N(1)-C(7)   | 104.10(18)  | Cl(1)-Ru(1)-C(16)-N(3)  | -104.8(2)   |
| C(16)-Ru(1)-N(1)-C(7)   | -66.1(3)    | C(37)-Ru(1)-C(16)-N(2)  | 176.52(17)  |
| O(1)-Ru(1)-N(1)-C(7)    | 5.31(17)    | O(1)-Ru(1)-C(16)-N(2)   | -85.55(17)  |
| Cl(1)-Ru(1)-N(1)-C(7)   | -167.29(17) | N(1)-Ru(1)-C(16)-N(2)   | -13.2(3)    |
| C(37)-Ru(1)-N(1)-C(8)   | -83.25(17)  | Cl(1)-Ru(1)-C(16)-N(2)  | 87.06(16)   |
| C(16)-Ru(1)-N(1)-C(8)   | 106.6(2)    | C(16)-N(3)-C(17)-C(18)  | 12.4(3)     |
| O(1)-Ru(1)-N(1)-C(8)    | 177.96(16)  | C(19)-N(3)-C(17)-C(18)  | -178.00(19) |
| Cl(1)-Ru(1)-N(1)-C(8)   | 5.35(15)    | C(16)-N(2)-C(18)-C(17)  | 13.4(2)     |
| Ru(1)-O(1)-C(1)-C(2)    | -177.19(14) | C(28)-N(2)-C(18)-C(17)  | -167.92(19) |
| Ru(1)-O(1)-C(1)-C(6)    | 2.2(3)      | N(3)-C(17)-C(18)-N(2)   | -14.2(2)    |
| O(1)-C(1)-C(2)-C(3)     | 176.9(2)    | C(16)-N(3)-C(19)-C(20)  | -110.3(3)   |
| C(6)-C(1)-C(2)-C(3)     | -2.5(3)     | C(17)-N(3)-C(19)-C(20)  | 81.6(3)     |
| C(1)-C(2)-C(3)-C(4)     | 0.8(4)      | C(16)-N(3)-C(19)-C(24)  | 72.1(3)     |
| C(2)-C(3)-C(4)-C(5)     | 1.3(3)      | C(17)-N(3)-C(19)-C(24)  | -95.9(3)    |
| C(3)-C(4)-C(5)-C(6)     | -1.8(3)     | C(24)-C(19)-C(20)-C(21) | -1.8(3)     |
| C(4)-C(5)-C(6)-C(7)     | -179.7(2)   | N(3)-C(19)-C(20)-C(21)  | -179.28(19) |
| C(4)-C(5)-C(6)-C(1)     | 0.1(3)      | C(24)-C(19)-C(20)-C(25) | 179.8(2)    |
| O(1)-C(1)-C(6)-C(5)     | -177.4(2)   | N(3)-C(19)-C(20)-C(25)  | 2.4(3)      |
| C(2)-C(1)-C(6)-C(5)     | 2.0(3)      | C(19)-C(20)-C(21)-C(22) | -0.6(3)     |
| O(1)-C(1)-C(6)-C(7)     | 2.5(3)      | C(25)-C(20)-C(21)-C(22) | 177.8(2)    |
| C(2)-C(1)-C(6)-C(7)     | -178.2(2)   | C(20)-C(21)-C(22)-C(23) | 2.1(3)      |
| C(8)-N(1)-C(7)-C(6)     | -176.5(2)   | C(20)-C(21)-C(22)-C(26) | -176.6(2)   |
| Ru(1)-N(1)-C(7)-C(6)    | -3.3(3)     | C(21)-C(22)-C(23)-C(24) | -1.2(3)     |
| C(5)-C(6)-C(7)-N(1)     | 178.1(2)    | C(26)-C(22)-C(23)-C(24) | 177.5(2)    |
| C(1)-C(6)-C(7)-N(1)     | -1.7(4)     | C(22)-C(23)-C(24)-C(19) | -1.1(3)     |
| C(7)-N(1)-C(8)-C(9)     | -93.8(2)    | C(22)-C(23)-C(24)-C(27) | 179.8(2)    |
| Ru(1)-N(1)-C(8)-C(9)    | 92.9(2)     | C(20)-C(19)-C(24)-C(23) | 2.7(3)      |
| C(7)-N(1)-C(8)-C(13)    | 84.8(2)     | N(3)-C(19)-C(24)-C(23)  | -179.90(19) |
| Ru(1)-N(1)-C(8)-C(13)   | -88.5(2)    | C(20)-C(19)-C(24)-C(27) | -178.3(2)   |
| C(13)-C(8)-C(9)-C(10)   | -2.0(3)     | N(3)-C(19)-C(24)-C(27)  | -0.8(3)     |
| N(1)-C(8)-C(9)-C(10)    | 176.53(19)  | C(16)-N(2)-C(28)-C(33)  | 95.2(3)     |
| C(13)-C(8)-C(9)-C(14)   | 177.0(2)    | C(18)-N(2)-C(28)-C(33)  | -83.2(3)    |
| N(1)-C(8)-C(9)-C(14)    | -4.5(3)     | C(16)-N(2)-C(28)-C(29)  | -90.2(3)    |
| C(8)-C(9)-C(10)-C(11)   | 0.3(3)      | C(18)-N(2)-C(28)-C(29)  | 91.3(3)     |
| C(14)-C(9)-C(10)-C(11)  | -178.7(2)   | C(33)-C(28)-C(29)-C(30) | -2.9(3)     |
| C(9)-C(10)-C(11)-C(12)  | 1.4(3)      | N(2)-C(28)-C(29)-C(30)  | -177.35(19) |
| C(9)-C(10)-C(11)-Br(1)  | -178.10(16) | C(33)-C(28)-C(29)-C(34) | 176.6(2)    |
| C(10)-C(11)-C(12)-C(13) | -1.3(3)     | N(2)-C(28)-C(29)-C(34)  | 2.2(3)      |
| Br(1)-C(11)-C(12)-C(13) | 178.16(16)  | C(28)-C(29)-C(30)-C(31) | 0.0(3)      |
| C(11)-C(12)-C(13)-C(8)  | -0.4(3)     | C(34)-C(29)-C(30)-C(31) | -179.6(2)   |
| C(11)-C(12)-C(13)-C(15) | 177.3(2)    | C(29)-C(30)-C(31)-C(32) | 1.7(3)      |
| C(9)-C(8)-C(13)-C(12)   | 2.0(3)      | C(29)-C(30)-C(31)-C(35) | -177.3(2)   |
| N(1)-C(8)-C(13)-C(12)   | -176.52(19) | C(30)-C(31)-C(32)-C(33) | -0.5(3)     |
| C(9)-C(8)-C(13)-C(15)   | -175.6(2)   | C(35)-C(31)-C(32)-C(33) | 178.5(2)    |
| N(1)-C(8)-C(13)-C(15)   | 5.8(3)      | C(29)-C(28)-C(33)-C(32) | 4.1(3)      |
| C(19)-N(3)-C(16)-N(2)   | -173.1(2)   | N(2)-C(28)-C(33)-C(32)  | 178.42(19)  |
| C(17)-N(3)-C(16)-N(2)   | -4.4(3)     | C(29)-C(28)-C(33)-C(36) | -173.7(2)   |
| C(19)-N(3)-C(16)-Ru(1)  | 17.8(3)     | N(2)-C(28)-C(33)-C(36)  | 0.7(3)      |
| C(17)-N(3)-C(16)-Ru(1)  | -173.61(17) | C(31)-C(32)-C(33)-C(28) | -2.3(3)     |
| C(28)-N(2)-C(16)-N(3)   | 175.2(2)    | C(31)-C(32)-C(33)-C(36) | 175.5(2)    |
| C(18)-N(2)-C(16)-N(3)   | -6.2(3)     | C(16)-Ru(1)-C(37)-C(38) | 95.1(2)     |
| C(28)-N(2)-C(16)-Ru(1)  | -13.8(3)    | O(1)-Ru(1)-C(37)-C(38)  | 10.1(2)     |

|                         |            |
|-------------------------|------------|
| N(1)-Ru(1)-C(37)-C(38)  | -81.3(2)   |
| Cl(1)-Ru(1)-C(37)-C(38) | -170.3(2)  |
| Ru(1)-C(37)-C(38)-C(39) | -12.3(4)   |
| Ru(1)-C(37)-C(38)-C(43) | 168.22(19) |
| C(43)-C(38)-C(39)-C(40) | -0.6(3)    |
| C(37)-C(38)-C(39)-C(40) | 179.9(2)   |
| C(38)-C(39)-C(40)-C(41) | -0.6(4)    |
| C(39)-C(40)-C(41)-C(42) | 1.2(4)     |
| C(40)-C(41)-C(42)-C(43) | -0.4(5)    |
| C(41)-C(42)-C(43)-C(38) | -0.9(5)    |
| C(39)-C(38)-C(43)-C(42) | 1.4(4)     |
| C(37)-C(38)-C(43)-C(42) | -179.1(2)  |

---

Symmetry transformations were used to generate equivalent atoms.
